# Supplementary material
Source: publisher figshare collection journal article supplement (https://wiley.figshare.com/articles/dataset/_/3561390)
Supplement: Supplementary file 1 [file 1]

## 1 **Ecological Archives Appendices**

### 2 ***Appendix B. Model fit and diagnostics.***

3 For Bayesian SSMs, especially relatively complex ones such as those employed here, convergence  
4 is difficult to prove but model diagnostics are essential to reveal any major estimation flaws. For  
5 every model run we employed a number of approaches to check model convergence and fit which  
6 are detailed below.

7       Firstly, we examined whether the movement process model provided apparently sensible  
8 results across species. For the primary estimated parameters ( $\gamma$ ,  $\theta$ ,  $\beta$ ,  $m$ ) governing the movement  
9 process model we also (i) visually inspected and applied autocorrelation functions to the  
10 MCMC sample chains; (ii) examined the Brooks–Gelman–Rubin potential scale reduction factor ( $\hat{r}$ )  
11 (Brooks and Gelman 1998), using  $\hat{r} \leq 1.1$  as a threshold for convergence, and (iii) assessed  
12 correlation between the posterior samples, in particular between the intercept ( $\beta_1$  and  $\beta_2$ ) and  
13 covariate coefficient ( $m$ ) estimates, to check for parameter identifiability issues. For the position  
14 estimates, (iv) Geweke’s simple test for convergence (Geweke 1992) was applied to all locations,  
15 and the standard Normal test sizes (Z-scores) plotted in a QQ-plot.

16       Visual inspection of the MCMC chains of the main model parameters revealed generally  
17 good stability and low autocorrelation within the MCMC samples for the majority of model runs.  
18 Examination of the estimated movement parameters ( $\gamma$ ,  $\theta$ , and  $\varphi$ ) showed generally good  
19 discrimination of two movement states for the majority of model runs (Table B1). Variability across  
20 species was apparent in the relative switching probabilities ( $\varphi_1$  and  $\varphi_2$ ), with WED and SES  
21 showing the highest and lowest state transition frequencies, respectively (Table B1).

22       Problems were evident for WED batch 2 which estimated very similar values for  $\gamma_1$  and  $\gamma_2$   
23 (Table B1). Patterns were observed in the MCMC traces and autocorrelation plots of these model  
24 runs, most commonly for  $\gamma_1$ ,  $\beta_1$  and  $\beta_2$ , indicating these parameters were not well resolved (Figure

25 B1). This batch series did not discriminate any meaningful vertical-horizontal movement  
26 relationships (refer to Table A1, Appendix A).

27 Problems were similarly apparent in the MCMC traces for CES batches 1 and 2, although no  
28 analogous problems were observed for batch 3. For CES batch 1 one model clearly failed to  
29 converge (run 3: examining maximum dive depth) and another (run 5: examining dive duration)  
30 again estimated very similar values for  $\gamma_1$  and  $\gamma_2$ . States were therefore determined largely on the  
31 basis of the theta estimates, resulting in what is known as “state-flipping” (*i.e.* here state 1 =  
32 ‘resident’). Interpretation of switching probabilities relative to other model runs was therefore not  
33 possible. For the remainder of runs in these batches, the most stable were those examining dive  
34 residual. Stronger wandering trends and autocorrelation was apparent in the other dive variable runs  
35 indicating poor mixing and poor resolution of parameters (in all cases for  $\gamma_1$ ,  $\beta_2$  but also in  $\gamma_1$ ,  $\beta_1$ ,  
36  $m_1$ ).

37 Excluding the problematic cases documented above, in all remaining model runs the  
38 Brooks-Gelman-Rubin diagnostic (the potential scale reduction factor:  $\hat{r}$ ) for the intercept ( $\beta_1$  and  
39  $\beta_2$ ) and coefficient ( $m$ ) parameters governing the dive-movement relationships showed 100% of  $\hat{r}$   
40 values were  $\leq 1.1$  (a rule of thumb threshold for convergence). The inspection of pair-wise  
41 correlations amongst these three parameters ( $\beta_1$ ,  $\beta_2$ ,  $m$ ) revealed high correlation ( $r > 0.8$ ) between  
42  $\beta_1$  and  $m$  for only those model runs examining the surface residual and maximum depth dive  
43 variables, and this slope-intercept co-variability in the MCMC was not found to be associated with  
44 any other evidence of problems with model fitting.

45 Finally, the QQ-plots of the test sizes (z-scores) calculated from Geweke’s convergence test  
46 applied to the location estimates generally showed these to be normally distributed for the majority  
47 of model runs, aside from some isolated outliers and small tails. Exceptions to this were observed in  
48 several Weddell seal runs (e.g. Figure B2), where strong departures from the normal distribution  
49 indicated some MCMC chains struggled with the estimation of a subset of positions.

50 **Table B1. Estimates for the movement parameters** ( $\gamma_i$  and  $\theta_i$ ) governing two behavioral states  
 51 (where  $i \in [1, 2]$  is the behavioral state index such that 1 = ‘directed’ (D) and 2 = ‘resident’ (R))  
 52 and the probabilities of switching ( $\varphi_i$ ) between states at any time  $t$ . Note that  $\text{Pr}[D|D] = \varphi_1$  hence  
 53  $\text{Pr}[R|D] = 1 - \varphi_1$  whereas  $\text{Pr}[D|R] = \varphi_2$ . This study uses the model formulation where  $\varphi_1$  varies in  
 54 relation to covariates and  $\varphi_2$  is static (see Bestley et al. 2013 for process model equations). Estimate  
 55 values given are the posterior mean and s.d.

| Species | Batch | Run* | Movement parameters |             |              |             | Switch probabilities |               |
|---------|-------|------|---------------------|-------------|--------------|-------------|----------------------|---------------|
|         |       |      | $\gamma_1$          | $\gamma_2$  | $\theta_1$   | $\theta_2$  | $1 - \varphi_1$      | $\varphi_2$   |
| SES     | 1     | 1    | 0.79 ± 0.02         | 0.36 ± 0.03 | 0.02 ± 0.01  | 3.27 ± 0.05 | 0.976 ± 0.022        | 0.024 ± 0.006 |
| SES     | 1     | 2    | 0.79 ± 0.02         | 0.37 ± 0.03 | 0.02 ± 0.01  | 3.27 ± 0.05 | 0.973 ± 0.012        | 0.025 ± 0.006 |
| SES     | 1     | 3    | 0.79 ± 0.02         | 0.36 ± 0.03 | 0.02 ± 0.01  | 3.27 ± 0.05 | 0.978 ± 0.004        | 0.023 ± 0.005 |
| SES     | 1     | 4    | 0.79 ± 0.02         | 0.36 ± 0.03 | 0.02 ± 0.01  | 3.27 ± 0.05 | 0.978 ± 0.003        | 0.023 ± 0.005 |
| SES     | 1     | 5    | 0.79 ± 0.02         | 0.36 ± 0.03 | 0.02 ± 0.01  | 3.27 ± 0.05 | 0.978 ± 0.004        | 0.023 ± 0.005 |
| SES     | 2     | 1    | 0.83 ± 0.01         | 0.26 ± 0.05 | 0 ± 0.01     | 3.2 ± 0.08  | 0.971 ± 0.047        | 0.036 ± 0.008 |
| SES     | 2     | 2    | 0.83 ± 0.01         | 0.28 ± 0.05 | 0 ± 0.01     | 3.2 ± 0.08  | 0.973 ± 0.022        | 0.037 ± 0.009 |
| SES     | 2     | 3    | 0.83 ± 0.01         | 0.25 ± 0.05 | 0 ± 0.01     | 3.2 ± 0.08  | 0.98 ± 0.018         | 0.032 ± 0.008 |
| SES     | 2     | 4    | 0.83 ± 0.01         | 0.25 ± 0.05 | 0 ± 0.01     | 3.2 ± 0.09  | 0.982 ± 0.003        | 0.03 ± 0.007  |
| SES     | 2     | 5    | 0.84 ± 0.01         | 0.25 ± 0.05 | 0 ± 0.01     | 3.21 ± 0.08 | 0.976 ± 0.02         | 0.035 ± 0.008 |
| SES     | 3     | 1    | 0.81 ± 0.02         | 0.44 ± 0.05 | -0.01 ± 0.02 | 3.13 ± 0.05 | 0.974 ± 0.027        | 0.022 ± 0.006 |
| SES     | 3     | 2    | 0.82 ± 0.02         | 0.43 ± 0.04 | 0 ± 0.02     | 3.13 ± 0.05 | 0.971 ± 0.021        | 0.022 ± 0.006 |
| SES     | 3     | 3    | 0.81 ± 0.02         | 0.43 ± 0.05 | 0 ± 0.02     | 3.13 ± 0.05 | 0.976 ± 0.02         | 0.021 ± 0.006 |
| SES     | 3     | 4    | 0.81 ± 0.02         | 0.43 ± 0.05 | 0 ± 0.02     | 3.13 ± 0.05 | 0.974 ± 0.015        | 0.021 ± 0.006 |
| SES     | 3     | 5    | 0.82 ± 0.02         | 0.44 ± 0.04 | 0 ± 0.02     | 3.14 ± 0.05 | 0.969 ± 0.025        | 0.025 ± 0.007 |
| SES     | 4     | 1    | 0.79 ± 0.02         | 0.2 ± 0.05  | 0 ± 0.01     | 3.14 ± 0.12 | 0.978 ± 0.023        | 0.024 ± 0.007 |
| SES     | 4     | 2    | 0.78 ± 0.02         | 0.21 ± 0.05 | 0 ± 0.01     | 3.14 ± 0.12 | 0.98 ± 0.013         | 0.022 ± 0.006 |
| SES     | 4     | 3    | 0.78 ± 0.02         | 0.19 ± 0.05 | 0 ± 0.01     | 3.14 ± 0.13 | 0.984 ± 0.005        | 0.021 ± 0.006 |
| SES     | 4     | 4    | 0.78 ± 0.02         | 0.2 ± 0.05  | 0.01 ± 0.01  | 3.14 ± 0.12 | 0.984 ± 0.005        | 0.021 ± 0.006 |
| SES     | 4     | 5    | 0.79 ± 0.02         | 0.2 ± 0.05  | 0 ± 0.01     | 3.15 ± 0.12 | 0.981 ± 0.011        | 0.022 ± 0.006 |
| AFS     | 1     | 1    | 0.8 ± 0.03          | 0.04 ± 0.03 | 0.09 ± 0.02  | 2.62 ± 0.75 | 0.894 ± 0.007        | 0.159 ± 0.056 |
| AFS     | 1     | 2    | 0.76 ± 0.03         | 0.04 ± 0.03 | 0.1 ± 0.03   | 2.8 ± 0.77  | 0.914 ± 0.043        | 0.136 ± 0.055 |
| AFS     | 1     | 3    | 0.71 ± 0.04         | 0.04 ± 0.03 | 0.11 ± 0.03  | 2.85 ± 0.82 | 0.955 ± 0.02         | 0.088 ± 0.049 |
| AFS     | 1     | 5    | 0.79 ± 0.03         | 0.03 ± 0.02 | 0.09 ± 0.03  | 2.77 ± 0.87 | 0.893 ± 0.067        | 0.136 ± 0.056 |
| WED     | 1     | 1    | 0.72 ± 0.05         | 0.37 ± 0.05 | -0.01 ± 0.02 | 3.14 ± 0.05 | 0.615 ± 0.094        | 0.181 ± 0.029 |
| WED     | 1     | 2    | 0.72 ± 0.04         | 0.37 ± 0.05 | -0.01 ± 0.02 | 3.13 ± 0.05 | 0.598 ± 0.091        | 0.19 ± 0.031  |
| WED     | 1     | 3    | 0.72 ± 0.04         | 0.37 ± 0.05 | -0.01 ± 0.02 | 3.13 ± 0.05 | 0.635 ± 0.006        | 0.176 ± 0.029 |
| WED     | 1     | 4    | 0.72 ± 0.04         | 0.37 ± 0.05 | -0.01 ± 0.02 | 3.13 ± 0.05 | 0.624 ± 0.088        | 0.18 ± 0.029  |
| WED     | 1     | 5    | 0.72 ± 0.04         | 0.37 ± 0.05 | -0.01 ± 0.02 | 3.13 ± 0.05 | 0.631 ± 0.026        | 0.179 ± 0.029 |
| WED     | 2     | 1    | 0.63 ± 0.05         | 0.55 ± 0.03 | 0.05 ± 0.03  | 3.17 ± 0.03 | 0.856 ± 0.051        | 0.031 ± 0.011 |
| WED     | 2     | 2    | 0.62 ± 0.05         | 0.55 ± 0.04 | 0.06 ± 0.03  | 3.17 ± 0.03 | 0.86 ± 0.023         | 0.029 ± 0.012 |
| WED     | 2     | 3    | 0.64 ± 0.05         | 0.56 ± 0.03 | 0.05 ± 0.03  | 3.17 ± 0.03 | 0.812 ± 0.034        | 0.035 ± 0.012 |
| WED     | 2     | 4    | 0.63 ± 0.05         | 0.55 ± 0.03 | 0.05 ± 0.03  | 3.17 ± 0.03 | 0.829 ± 0.008        | 0.034 ± 0.013 |
| WED     | 2     | 5    | 0.64 ± 0.05         | 0.56 ± 0.03 | 0.05 ± 0.03  | 3.17 ± 0.03 | 0.816 ± 0.025        | 0.035 ± 0.013 |

|     |   |   |             |             |              |             |               |               |
|-----|---|---|-------------|-------------|--------------|-------------|---------------|---------------|
| WED | 3 | 1 | 0.74 ± 0.03 | 0.5 ± 0.04  | -0.04 ± 0.02 | 3.14 ± 0.03 | 0.598 ± 0.104 | 0.156 ± 0.021 |
| WED | 3 | 2 | 0.74 ± 0.03 | 0.5 ± 0.04  | -0.04 ± 0.02 | 3.14 ± 0.03 | 0.589 ± 0.113 | 0.157 ± 0.021 |
| WED | 3 | 3 | 0.75 ± 0.04 | 0.5 ± 0.04  | -0.04 ± 0.02 | 3.14 ± 0.03 | 0.616 ± 0.07  | 0.149 ± 0.02  |
| WED | 3 | 4 | 0.75 ± 0.03 | 0.5 ± 0.04  | -0.04 ± 0.02 | 3.14 ± 0.03 | 0.636 ± 0.032 | 0.144 ± 0.02  |
| WED | 3 | 5 | 0.75 ± 0.04 | 0.5 ± 0.04  | -0.04 ± 0.02 | 3.14 ± 0.03 | 0.606 ± 0.071 | 0.153 ± 0.021 |
| WED | 4 | 1 | 0.8 ± 0.04  | 0.56 ± 0.03 | 0.01 ± 0.02  | 3.15 ± 0.04 | 0.814 ± 0.084 | 0.027 ± 0.006 |
| WED | 4 | 2 | 0.8 ± 0.04  | 0.56 ± 0.03 | 0.01 ± 0.02  | 3.15 ± 0.04 | 0.771 ± 0.097 | 0.03 ± 0.007  |
| WED | 4 | 3 | 0.78 ± 0.04 | 0.57 ± 0.03 | 0.01 ± 0.02  | 3.14 ± 0.04 | 0.809 ± 0.056 | 0.027 ± 0.006 |
| WED | 4 | 4 | 0.79 ± 0.04 | 0.56 ± 0.03 | 0.01 ± 0.02  | 3.15 ± 0.04 | 0.836 ± 0.011 | 0.026 ± 0.006 |
| WED | 4 | 5 | 0.79 ± 0.04 | 0.56 ± 0.03 | 0.01 ± 0.02  | 3.15 ± 0.04 | 0.812 ± 0.046 | 0.028 ± 0.006 |
| CES | 1 | 1 | 0.63 ± 0.05 | 0.19 ± 0.07 | 0.1 ± 0.06   | 3.23 ± 0.27 | 0.958 ± 0.01  | 0.013 ± 0.007 |
| CES | 1 | 5 | 0.39 ± 0.05 | 0.41 ± 0.05 | 0.3 ± 0.08   | 2.45 ± 0.15 | 0.973 ± 0.041 | 0.032 ± 0.015 |
| CES | 2 | 1 | 0.63 ± 0.07 | 0.22 ± 0.09 | 0.03 ± 0.06  | 3.24 ± 0.31 | 0.965 ± 0.016 | 0.02 ± 0.012  |
| CES | 2 | 3 | 0.62 ± 0.06 | 0.17 ± 0.09 | 0.04 ± 0.06  | 3.3 ± 0.37  | 0.979 ± 0.012 | 0.014 ± 0.011 |
| CES | 2 | 5 | 0.66 ± 0.07 | 0.18 ± 0.08 | 0.03 ± 0.06  | 3.27 ± 0.34 | 0.949 ± 0.08  | 0.023 ± 0.013 |
| CES | 3 | 1 | 0.69 ± 0.05 | 0.14 ± 0.06 | 0.02 ± 0.04  | 3.28 ± 0.32 | 0.883 ± 0.051 | 0.045 ± 0.018 |
| CES | 3 | 3 | 0.7 ± 0.06  | 0.13 ± 0.06 | 0.02 ± 0.05  | 3.31 ± 0.35 | 0.883 ± 0.016 | 0.043 ± 0.018 |
| CES | 3 | 5 | 0.7 ± 0.06  | 0.13 ± 0.06 | 0.02 ± 0.05  | 3.28 ± 0.35 | 0.864 ± 0.058 | 0.048 ± 0.021 |

56 \*Run refers here to the dive variable examined where: 1 = 'dive residual'; 2 = 'surface residual'; 3

57 = maximum dive depth; 4 = bottom time; 5 = dive duration.

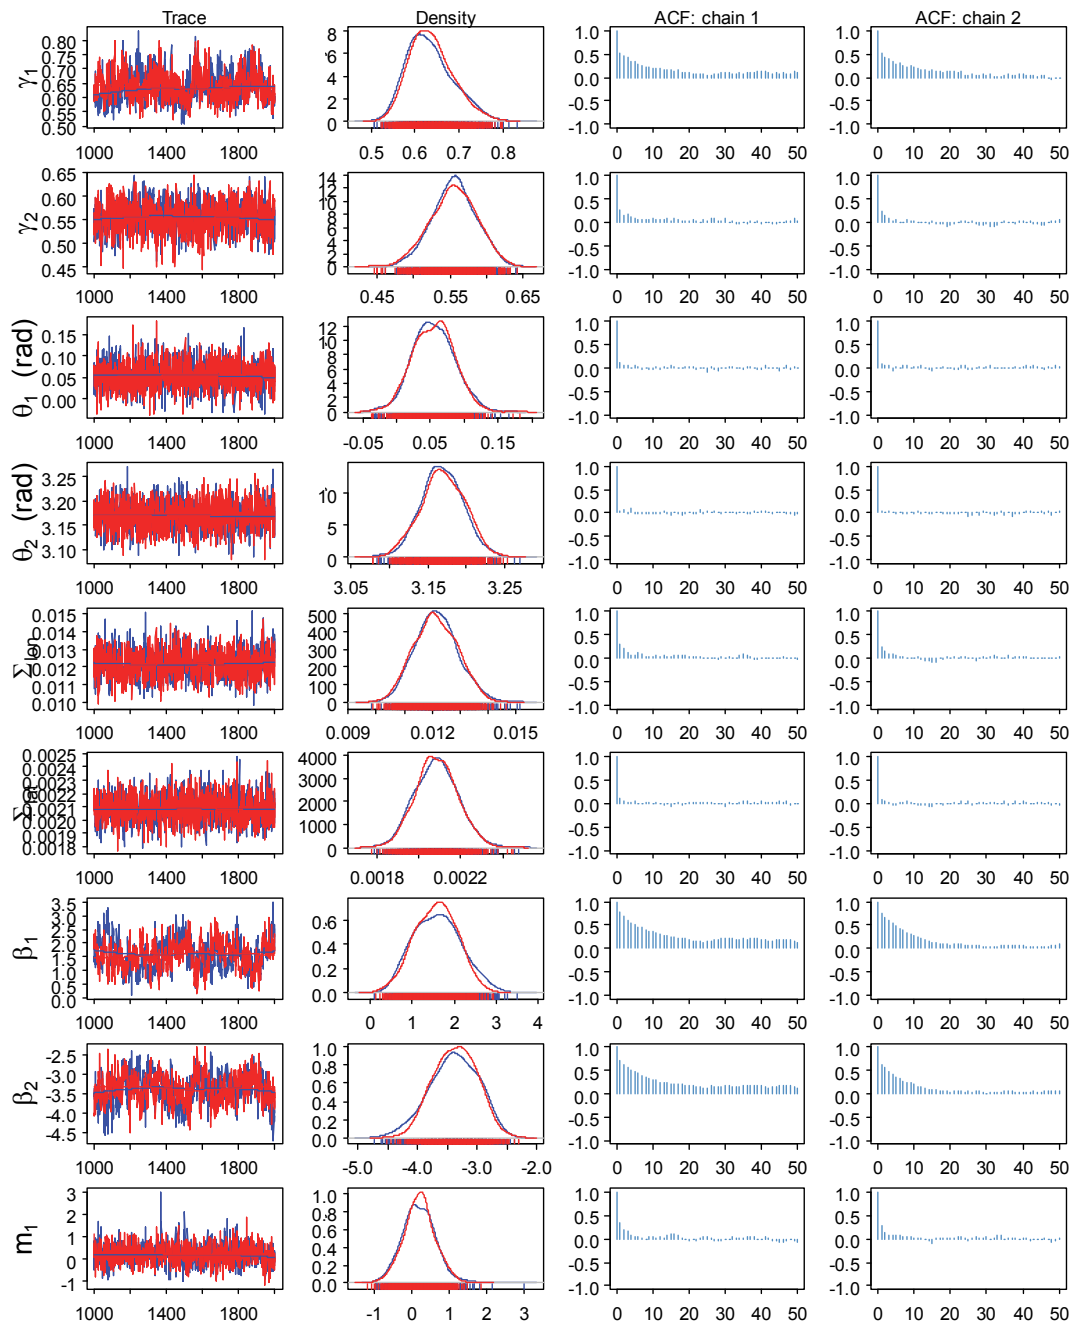

58  
 59 **Figure B1.** Example diagnostic summary showing problematic model fit for Weddell seal batch 2  
 60 (model run 5: examining dive duration). Each row contains: a trace plot of the thinned chains,  
 61 density plot of the thinned chains, auto-correlation function of the thinned chains. Failure to  
 62 discriminate well between  $\gamma_1$  and  $\gamma_2$  results in poor ability to identify the intercept parameters

- 63 governing switching between movement states ( $\beta_1$  and  $\beta_2$ ), and no resolution of the covariate
- 64 coefficient ( $m_1 \sim 0$ ).

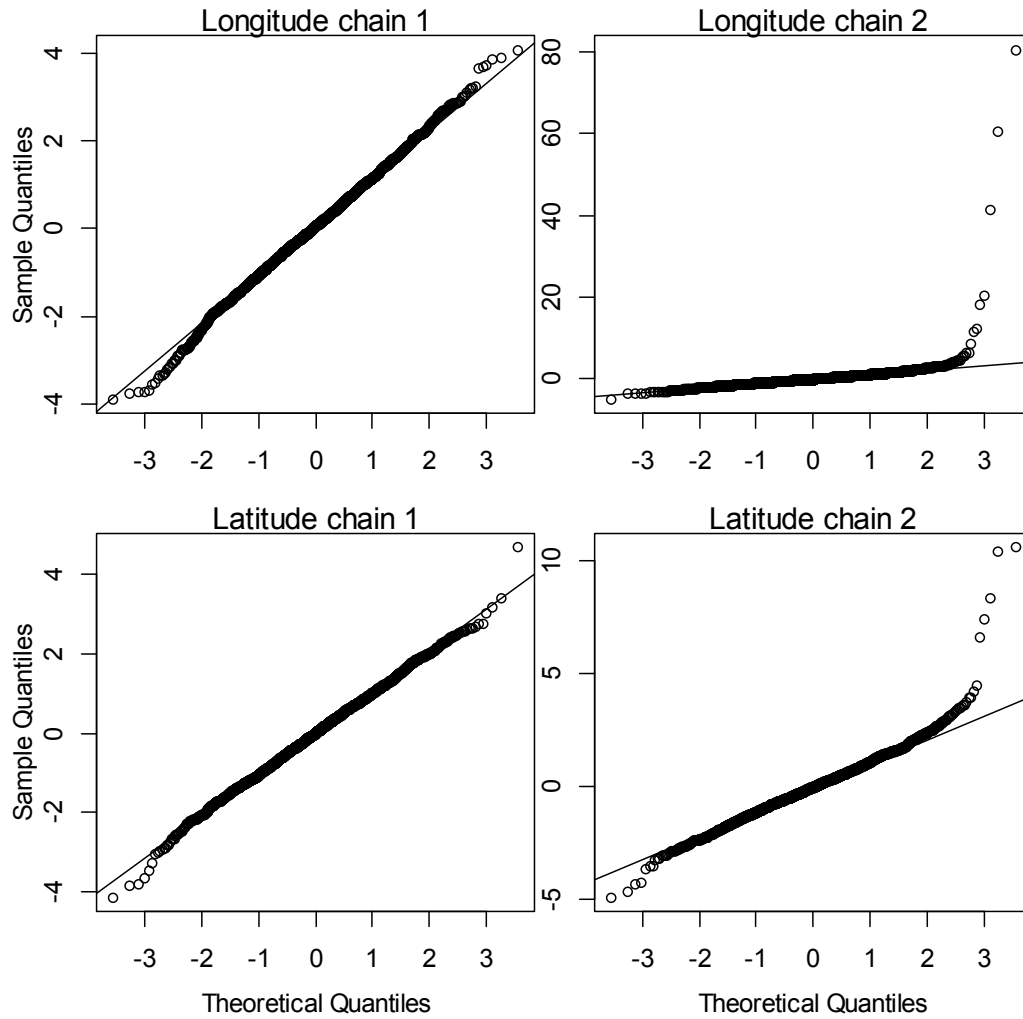

65

66

67 **Figure B2.** QQ-plots of the test sizes (z-scores) calculated from Geweke's convergence test of the  
 68 MCMC chains for estimated positions (2715 longitudes and latitudes), using a Weddell seal  
 69 example (batch 4 run 3: examining maximum dive depth). Points should lie on the line with  
 70 intersect 0 and slope 1, which is not the case here for chain 2.

71 **References**

- 72 Bestley, S., I. D. Jonsen, M. A. Hindell, C. Guinet, and J. B. Charrassin. 2013. Integrative  
73 modelling of animal movement: incorporating in situ habitat and behavioural information for a  
74 migratory marine predator. *Proceedings of the Royal Society B-Biological Sciences* **280**:22262-  
75 22262.
- 76 Brooks, S. P. and A. Gelman. 1998. General methods for monitoring convergence of iterative  
77 simulations. *Journal of Computational and Graphical Statistics* **7**:434-455.
- 78 Geweke, J. 1992. Evaluating the accuracy of sampling-based approaches to calculating posterior  
79 moments. *in* J. M. Bernardo, J. O. Berger, A. P. Dawid, and A. F. M. Smith, editors. *Bayesian*  
80 *Statistics* 4. Clarendon Press, Oxford, UK.
